# Supplementary material for: The Activation of JAK/STAT3 Signaling and the Complement System Modulate Inflammation in the Primary Human Dermal Fibroblasts of PXE Patients
Source: MDPI journal article supplement (doi:10.3390/biomedicines11102673), 2023-09-29
Supplement: s1 [file s1]

## Supplementary file

**Table S1:** Primer sequences used for quantitative real-time PCR

| Gene                                                                      | Protein | 5'-3' Sequence                                   | Reference          | Annealing Temperature (°C) | Efficiency |
|---------------------------------------------------------------------------|---------|--------------------------------------------------|--------------------|----------------------------|------------|
| <i>ACTB</i><br><i>Beta-actin</i>                                          | β-Actin | CGCGAGAAGATGACCC<br>ATTGCCAATGGTGATGAC           | NM_001101          | 59                         | 2.0        |
| <i>GAPDH</i><br><i>Glycerinaldehyd-3-phosphate-dehydrogenase</i>          | GAPDH   | AGGTCGGAGTCAACGGAT<br>TCCTGGAAGATGGTGATG         | NM_002046          | 59                         | 1.8        |
| <i>β2M</i> <i>Beta-2-mikroglobulin</i>                                    | β2M     | TGTGCTCGCGCTACTCTCTCTT<br>CGGATGGATGAAACCCAGACA  | NM_004048          | 59                         | 2.0        |
| <i>STAT3</i><br><i>Signal transducer and activator of transcription 3</i> | STAT3   | ATGGAGATTGCCCCGGATTGT<br>AGCTCACTCACGATGCTTCTC   | NM_00138499<br>3.1 | 66                         | 1.8        |
| <i>SOCS3</i><br><i>Suppressor of cytokine signaling 3</i>                 | SOCS3   | GGAGACTTCGATTCCGGGACC<br>GAAACTTGCTGTGGGTGACC    | NM_003955.5        | 68                         | 2.0        |
| <i>IL-6</i><br><i>Interleukin-6</i>                                       | IL-6    | ACAGCCACTCACCTCTTCAG<br>GTGCCTCTTTGCTGCTTTCAC    | NM_000600.4        | 63                         | 1.9        |
| <i>MCP-1</i><br><i>Monocyte chemoattractant protein-1</i>                 | MCP-1   | CTTCTGTGCCTGCTGCTCATAG<br>CTTCTGTGCCTGCTGCTCATAG | NM_002982.3        | 63                         | 2.0        |
| <i>CXCL1</i><br><i>Chemokine (C-X-C motif) ligand 1</i>                   | CXCL1   | TCCTGCATCCCCCATAGTTA<br>CTTCAGGAACAGCCACCAGT     | NM_001511.4        | 63                         | 1.8        |
| <i>IGFBP3</i><br><i>Insulin-like-growth-factor-binding-protein-3</i>      | IGFBP3  | GCGCCAGGAAATGCTAGTGA<br>GGGAATGTGTACACCCCTGG     | NM_00101339<br>8.1 | 63                         | 1.8        |
| <i>C3</i><br><i>Complement C3</i>                                         | C3      | GAGAAGACTGTGCTGACCCC<br>GATGCCTTCCGGGTCTCAA      | NM_000064.4        | 68                         | 1.9        |
| <i>C1r</i><br><i>Complement C1r</i>                                       | C1r     | GAGGAGAATGCCAGTGGTGG<br>GCTTCACCCTGTATCCCGTG     | NM_00135434<br>6.2 | 68                         | 1.9        |
| <i>C1s</i><br><i>Complement C1s</i>                                       | C1s     | ACCAAAGAAGGTGCTTGTTTT<br>AGTGTCCTGAGATTATCACATC  | NM_00134685<br>0.2 | 63                         | 2.0        |
| <i>C2</i><br><i>Complement C2</i>                                         | C2      | CCTGCCCTCAGAACGTGAAT<br>CTGGACAGCGCACAGGTTT      | NM_000063.6        | 66                         | 1.9        |
| <i>C4A</i><br><i>Complement C4A</i>                                       | C4A     | CCAAGCTGACCTCCCTCTC<br>TAACCTGGAAGCCGTACTCC      | NM_007293.3        | 63                         | 1.9        |

|                                                    |          |                                                 |             |    |     |
|----------------------------------------------------|----------|-------------------------------------------------|-------------|----|-----|
| <i>CFB</i><br><i>Complement factor B</i>           | CFB      | CCCCGGTCTCCCTACTACAA<br>AGGTGACGCTGTCTTCAAGG    | NM_001710.6 | 66 | 1.8 |
| <i>CFH</i><br><i>Complement factor H</i>           | CFH      | GGAAGAGGAGAACTGGACGTTG<br>ATGTCCACAGGGCCTTTTCTG | NM_000186.4 | 66 | 1.9 |
| <i>SERPING1</i><br><i>Serpin family G member 1</i> | SERPING1 | CAGAAGTTTGGAGTCCGCTG<br>TGTGTTGCGACCTTCCCTT     | NM_000062.3 | 68 | 2.0 |

---

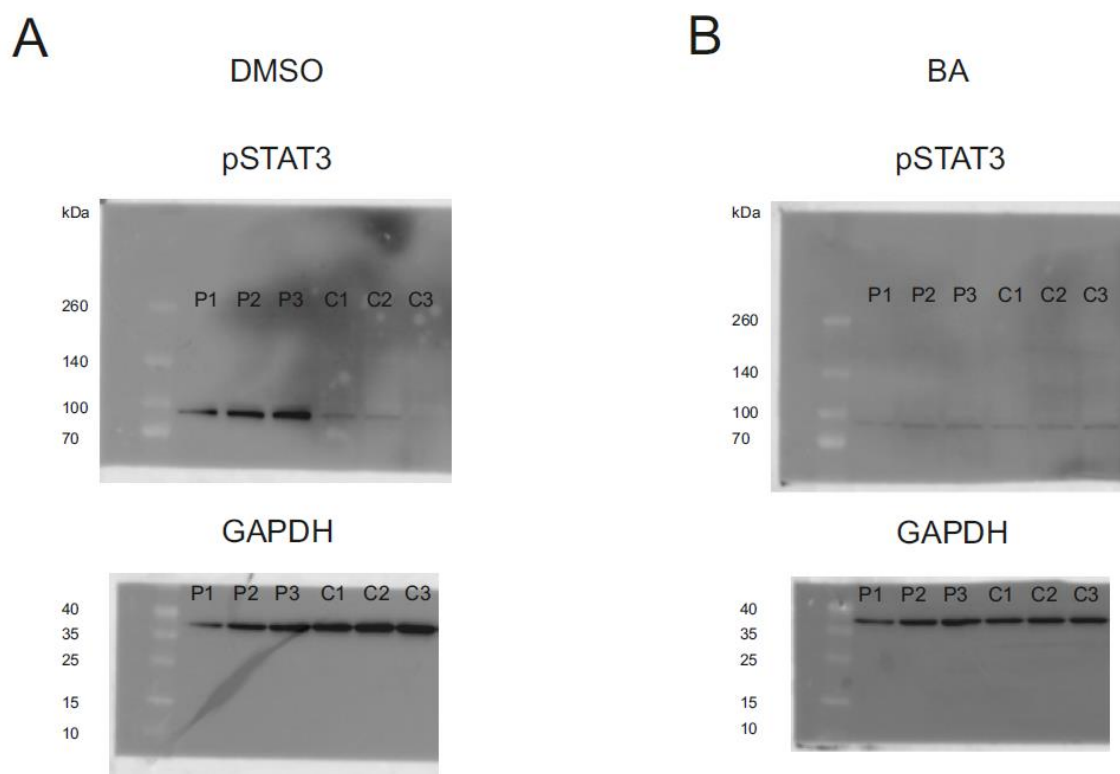

**Figure S1: Western blot analysis of PXE- and control fibroblasts of pSTAT3 and GAPDH.** Dermal fibroblasts from patients with pseudoxanthoma elasticum (P1-3) (n = 4) and normal human dermal fibroblasts (C1-3) (n = 4) were cultivated for 72 h in medium with 10 % lipoprotein deficient fetal calf serum (LDPS). Fibroblasts were treated with (A) DMSO or (B) 1  $\mu$ M baricitinib (BA). Active STAT3 phosphorylated at tyrosine 705 (pSTAT3) and GAPDH were analyzed, 20  $\mu$ g protein were used for analysis.
